# Supplementary material for: Citations of scientific results and conflicts of interest: the case of mammography screening
Source: PubMed Central journal article supplement — Evid Based Med. 2013 Jun;18(3):83–9. doi: 10.1136/eb-2012-101216 (PMC3664368; doi:10.1136/eb-2012-101216), 2013-06
Supplement: ebmed-2012-101216-s1.pdf [file ebmed-2012-101216-s1.pdf]

| <b>Not applicable in all of the outcomes</b>      |              |
|---------------------------------------------------|--------------|
| <b>Topic of paragraph</b>                         | <b>% (n)</b> |
| Controversy                                       | 47%(15)      |
| A trial not including one of the Cochrane reviews | 3% (1)       |
| Ubiquitous literature                             | 3% (1)       |
| Informed choice                                   | 3% (1)       |
| Lung cancer screening                             | 3% (1)       |
| Numbers needed to treat                           | 3% (1)       |
| Incidence and survival                            | 3% (1)       |
| Screening <50 year olds                           | 6% (2)       |
| Critique of mammography screening                 | 3% (1)       |
| Mammography screening RCTs                        | 3% (1)       |
| Uncertainty of estimates from RCTs                | 3% (1)       |
| Table on trial selection                          | 3% (1)       |
| Benefits of Breast cancer screening               | 6% (2)       |
| False positives                                   | 3% (1)       |
| Inclusion of trials in different studies          | 3% (1)       |
| Screening frequency                               | 3% (1)       |

Appendix 1: The topic of the 32 paragraphs classified as 'not applicable' in all of the 5 outcomes (*overdiagnosis, overtreatment, breast cancer mortality, total mortality and*
